# Supplementary material for: Identification of a heterogeneous and dynamic ciliome during embryonic development and cell differentiation
Source: Oxford University Press journal article supplement (doi:10.1242/dev.201237), 2023-03-27
Supplement: dev201237supp.pdf [file dev201237supp.pdf]

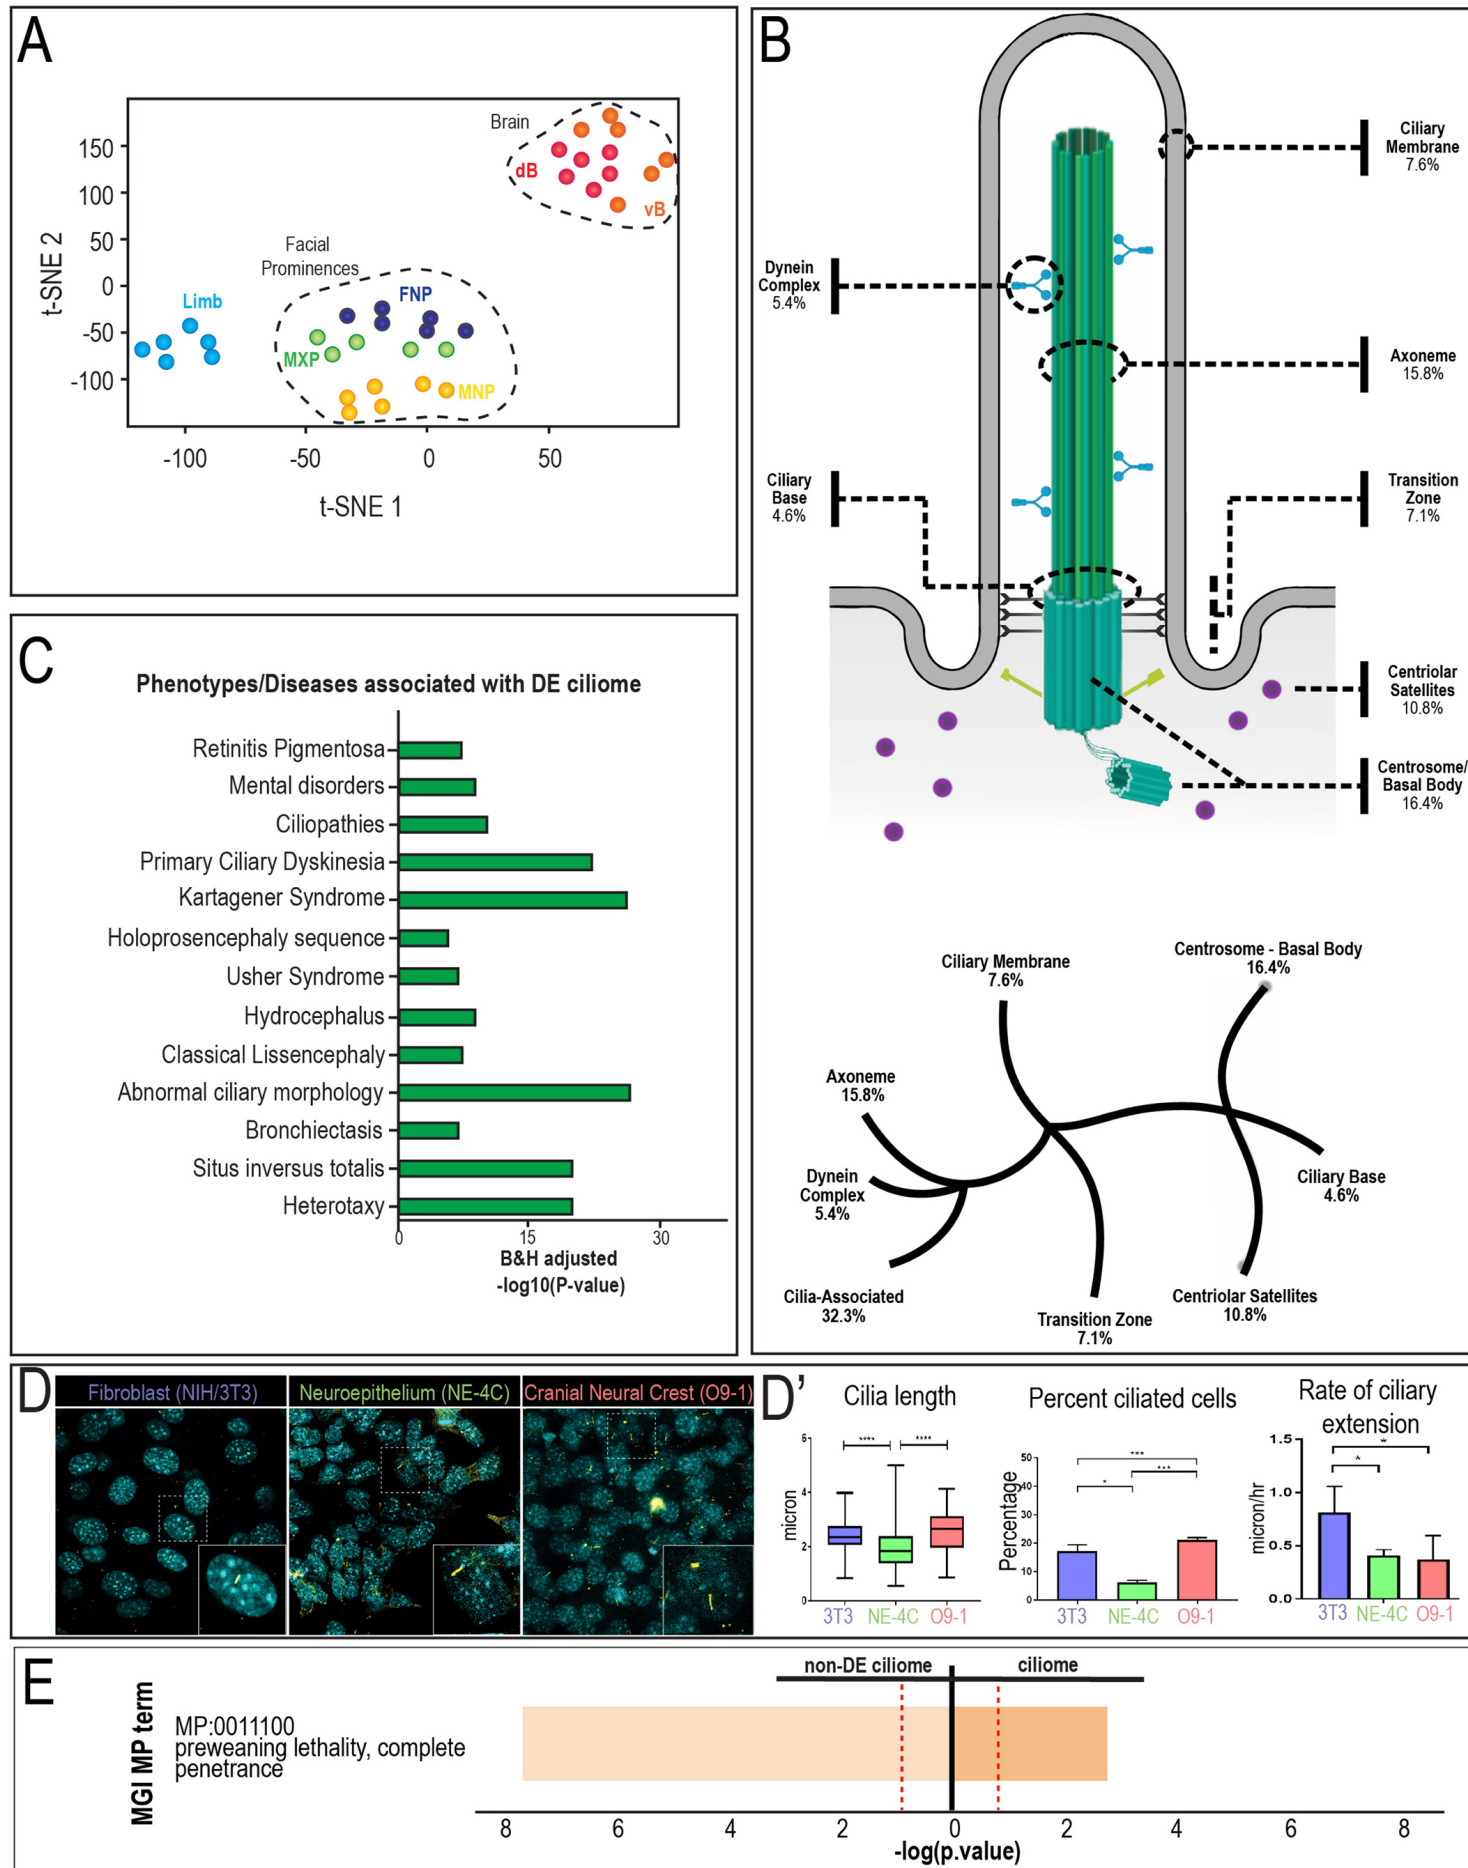

**Fig. S1.** (A) tSNE plot of sample clustering based upon bulk RNA-seq data. (B) Schematic of the ciliary apparatus and reactome showing the localization of proteins identified within the DE ciliome (if known). (C) GO terms associated with genes of the DE ciliome. (D) Immunohistochemistry for Arl13b in NIH3T3, NE4C and O9-1 cells. Dotted box indicates area of high magnification in inset. (D') Graphs showing the ciliary length, percentage of ciliated cells, and rate of ciliary extension quantification for NIH3T3, NE4C and O9-1 cells. (E) Enrichment analysis for MGI term "preweaning lethality, complete penetrance" between non-DE ciliome and full ciliome.

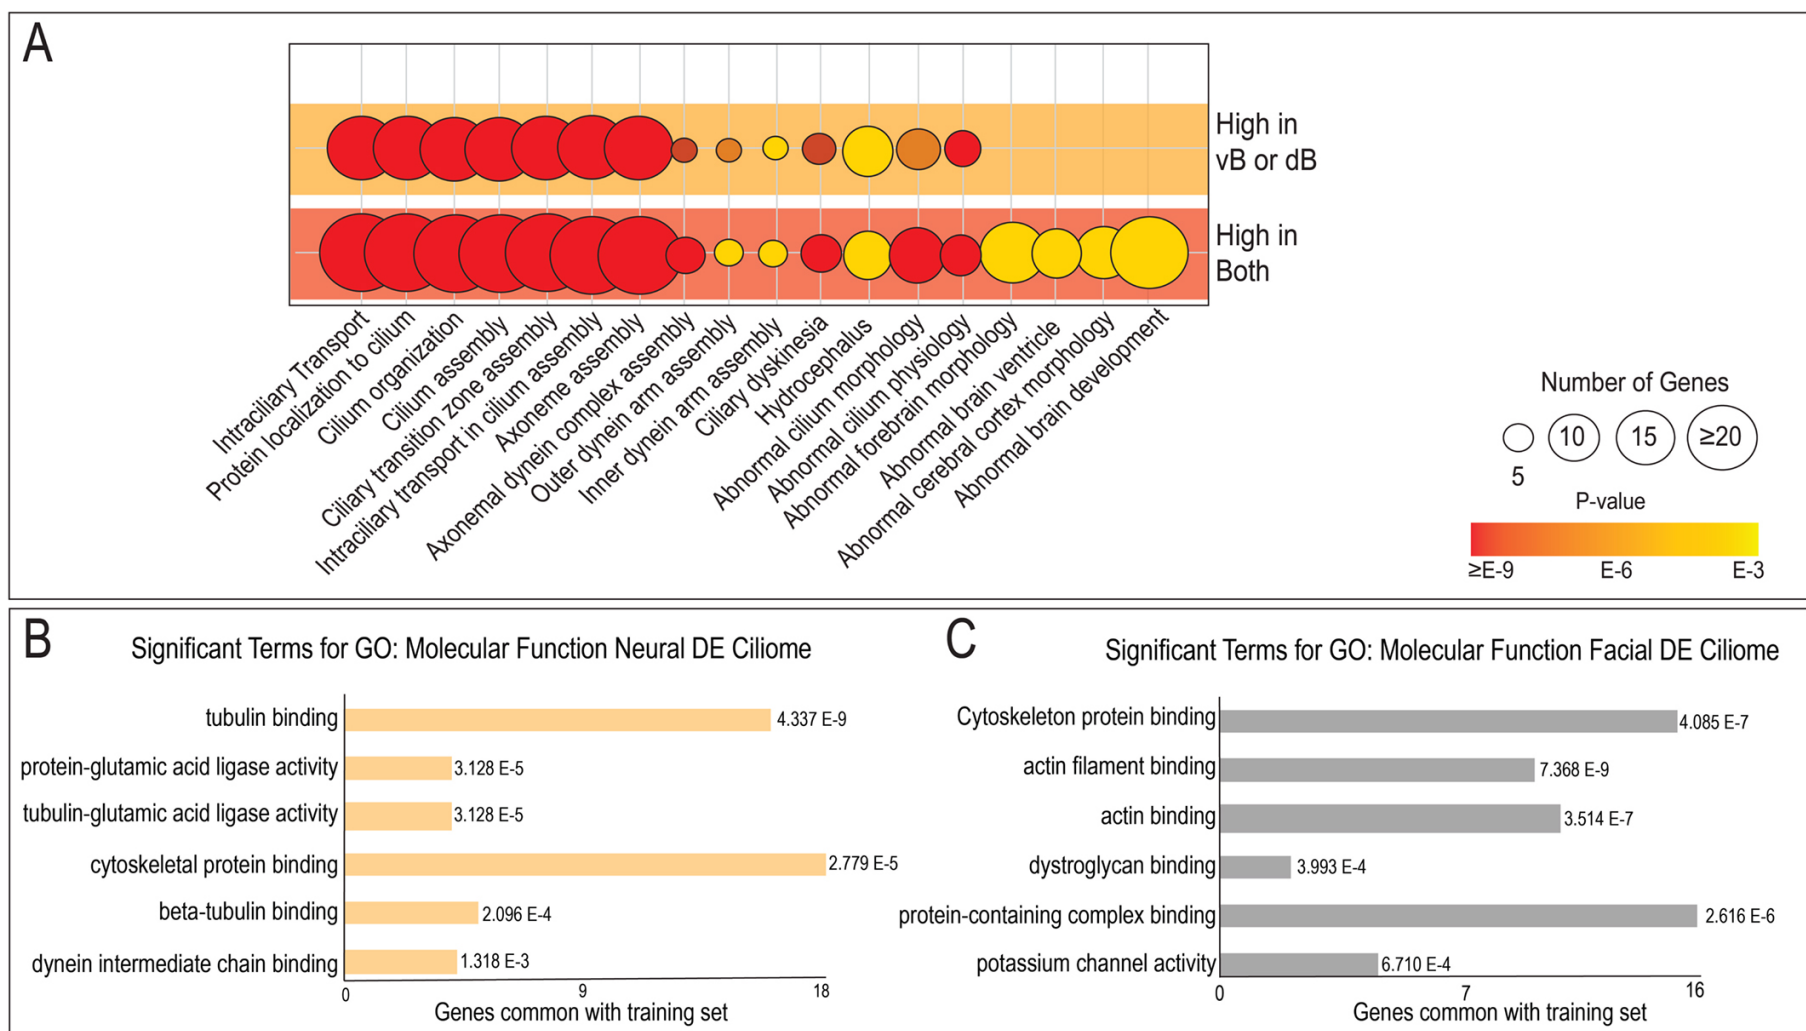

**Fig. S2. DE ciliome in dorsal and ventral neural tissues.** (A) Summary of GO terms enriched in ciliary genes robustly expressed in ventral (vB), dorsal (dB) or both neural tissues. Bubble size indicates number of ciliary genes per annotation, color reflects range of p-values. (B, C) GO-terms associated with molecular function of genes upregulated in neural and facial tissues (FDR < 0.05).

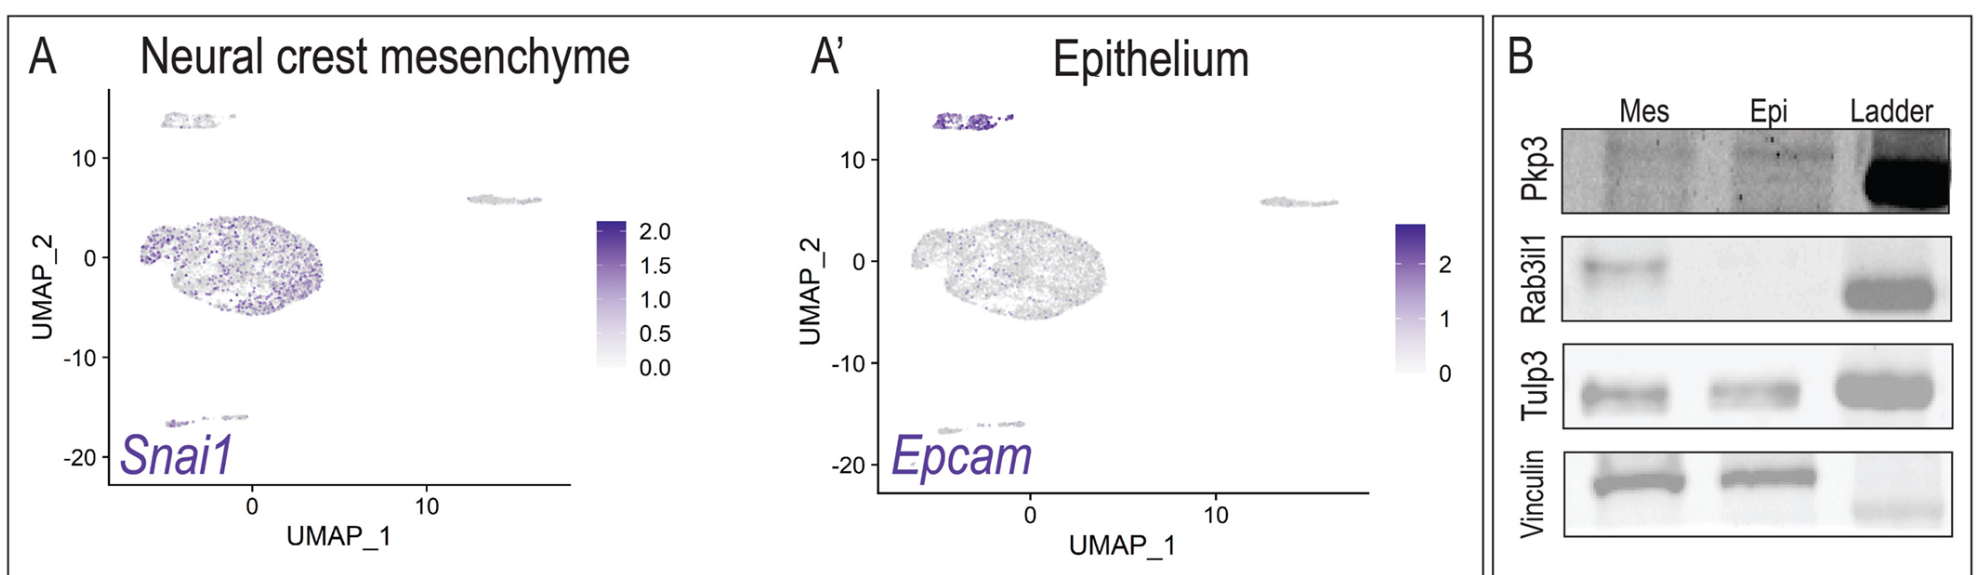

**Fig. S3.** (A) Feature plot of *Snai1* expression marking neural crest-derived mesenchyme in E11.5 MNP scRNA-seq. (A') Feature plot of *Epcam* expression marking epithelium in E11.5 MNP scRNA-seq. (B) Western blots for Pkp3, Rab3il1, and Tulp3 on micro-dissected and pooled E11.5 mesenchyme and epithelial tissue. Vinculin shown as loading control. Ladder in the rightmost column.

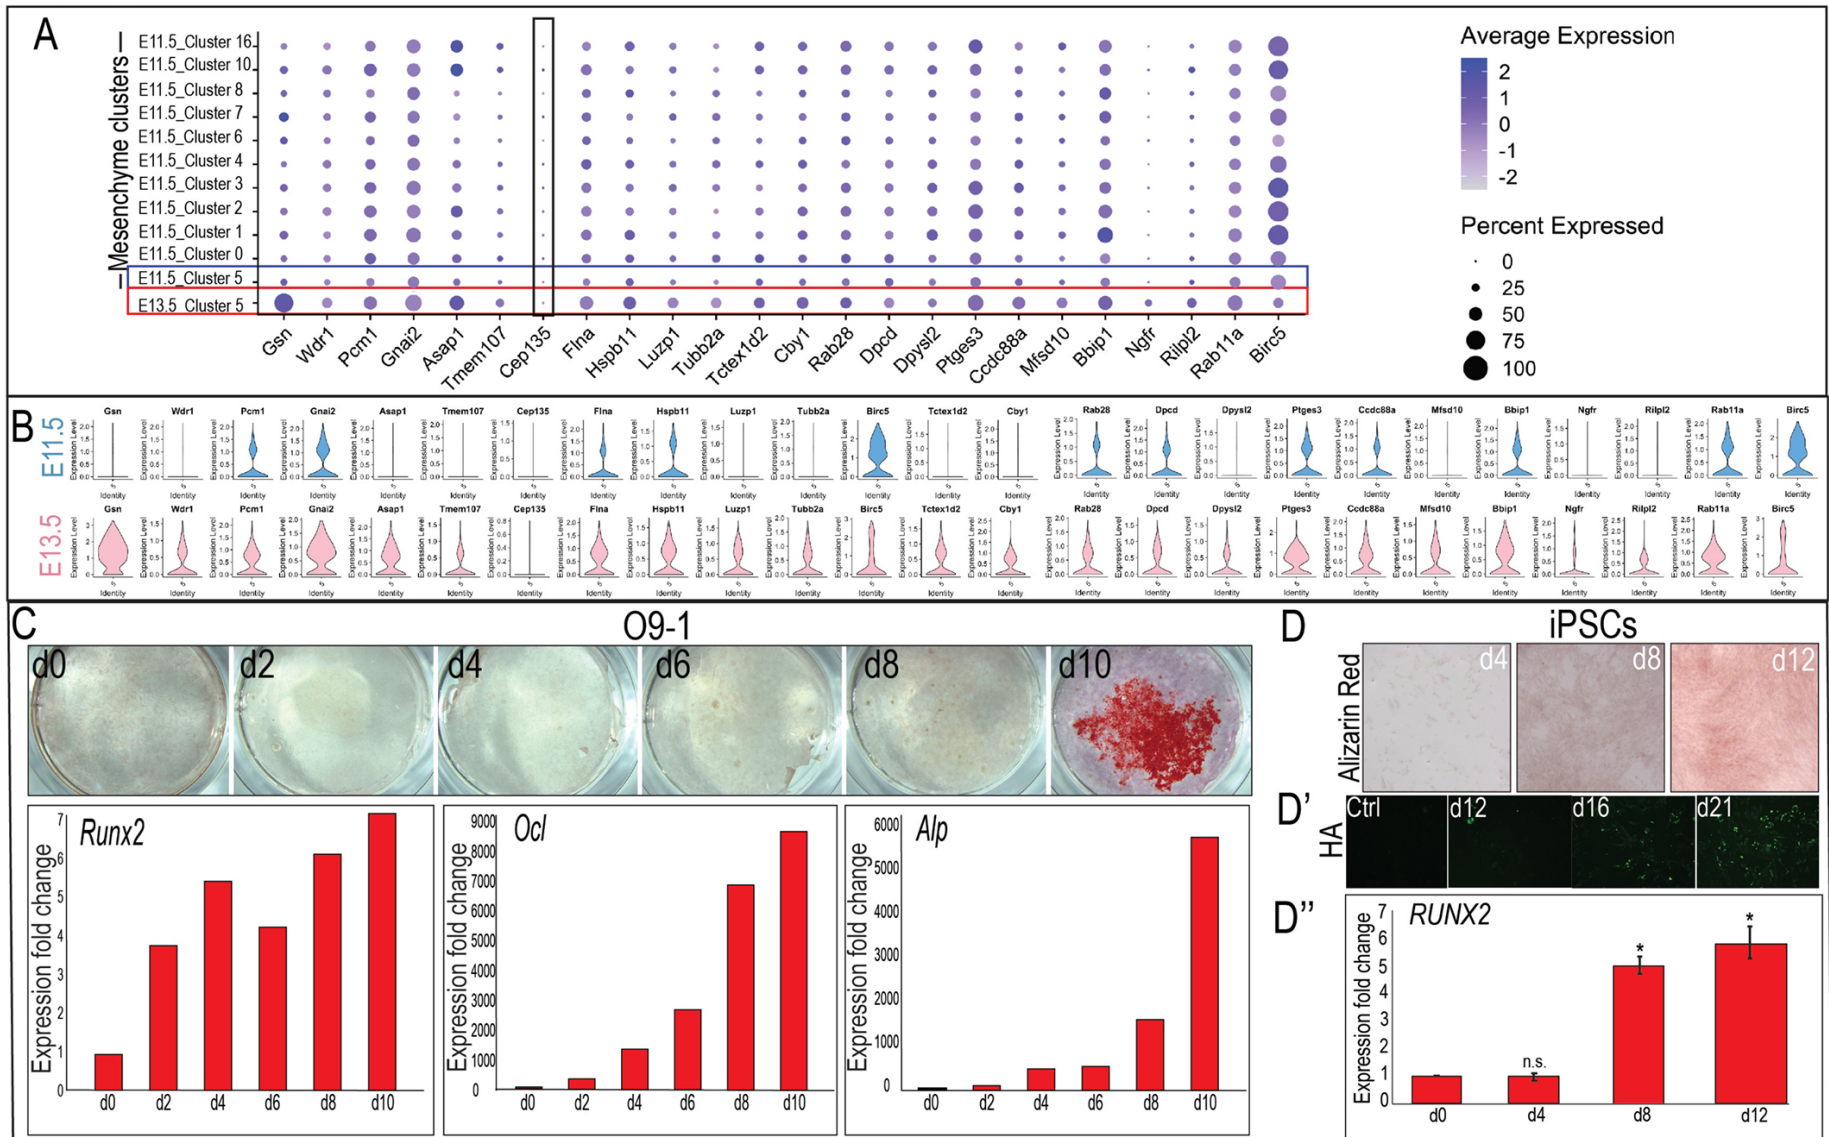

**Fig. S4.** (A) Dot plot depicting expression of genes within the osteogenic cilome in E11.5 mesenchymal clusters (Clusters 1-8, 10, 16) and E13.5 Cluster 5. Cluster 5 from E11.5 and Cluster 5 from E13.5 were compared as markers for skeletal progenitors were robustly expressed within these clusters. (B) Violin plots for genes of the osteogenic cilome within E11.5 Cluster 5 and E13.5 Cluster 5. (C) Alizarin red staining and qPCR for osteoblast markers *Runx2*, *Ocl*, and *Alp* on 09-1 NCCs from day 0 to day 10 of osteogenic differentiation. (D) Alizarin red staining on iPSC-derived NCCs from day 4 to day 12 of osteogenic differentiation. (D') Hydroxyapatite expression via Osteoimage Mineralization Assay on control (without r1-glycerophosphate) and iPSC-derived NCCs from day 12 to day 21 of osteogenic differentiation. (D'') Fold change expression of osteoblast markers *RUNX2* using qPCR from iPSC derived NCCs from d0 to d12 of osteogenic differentiation.

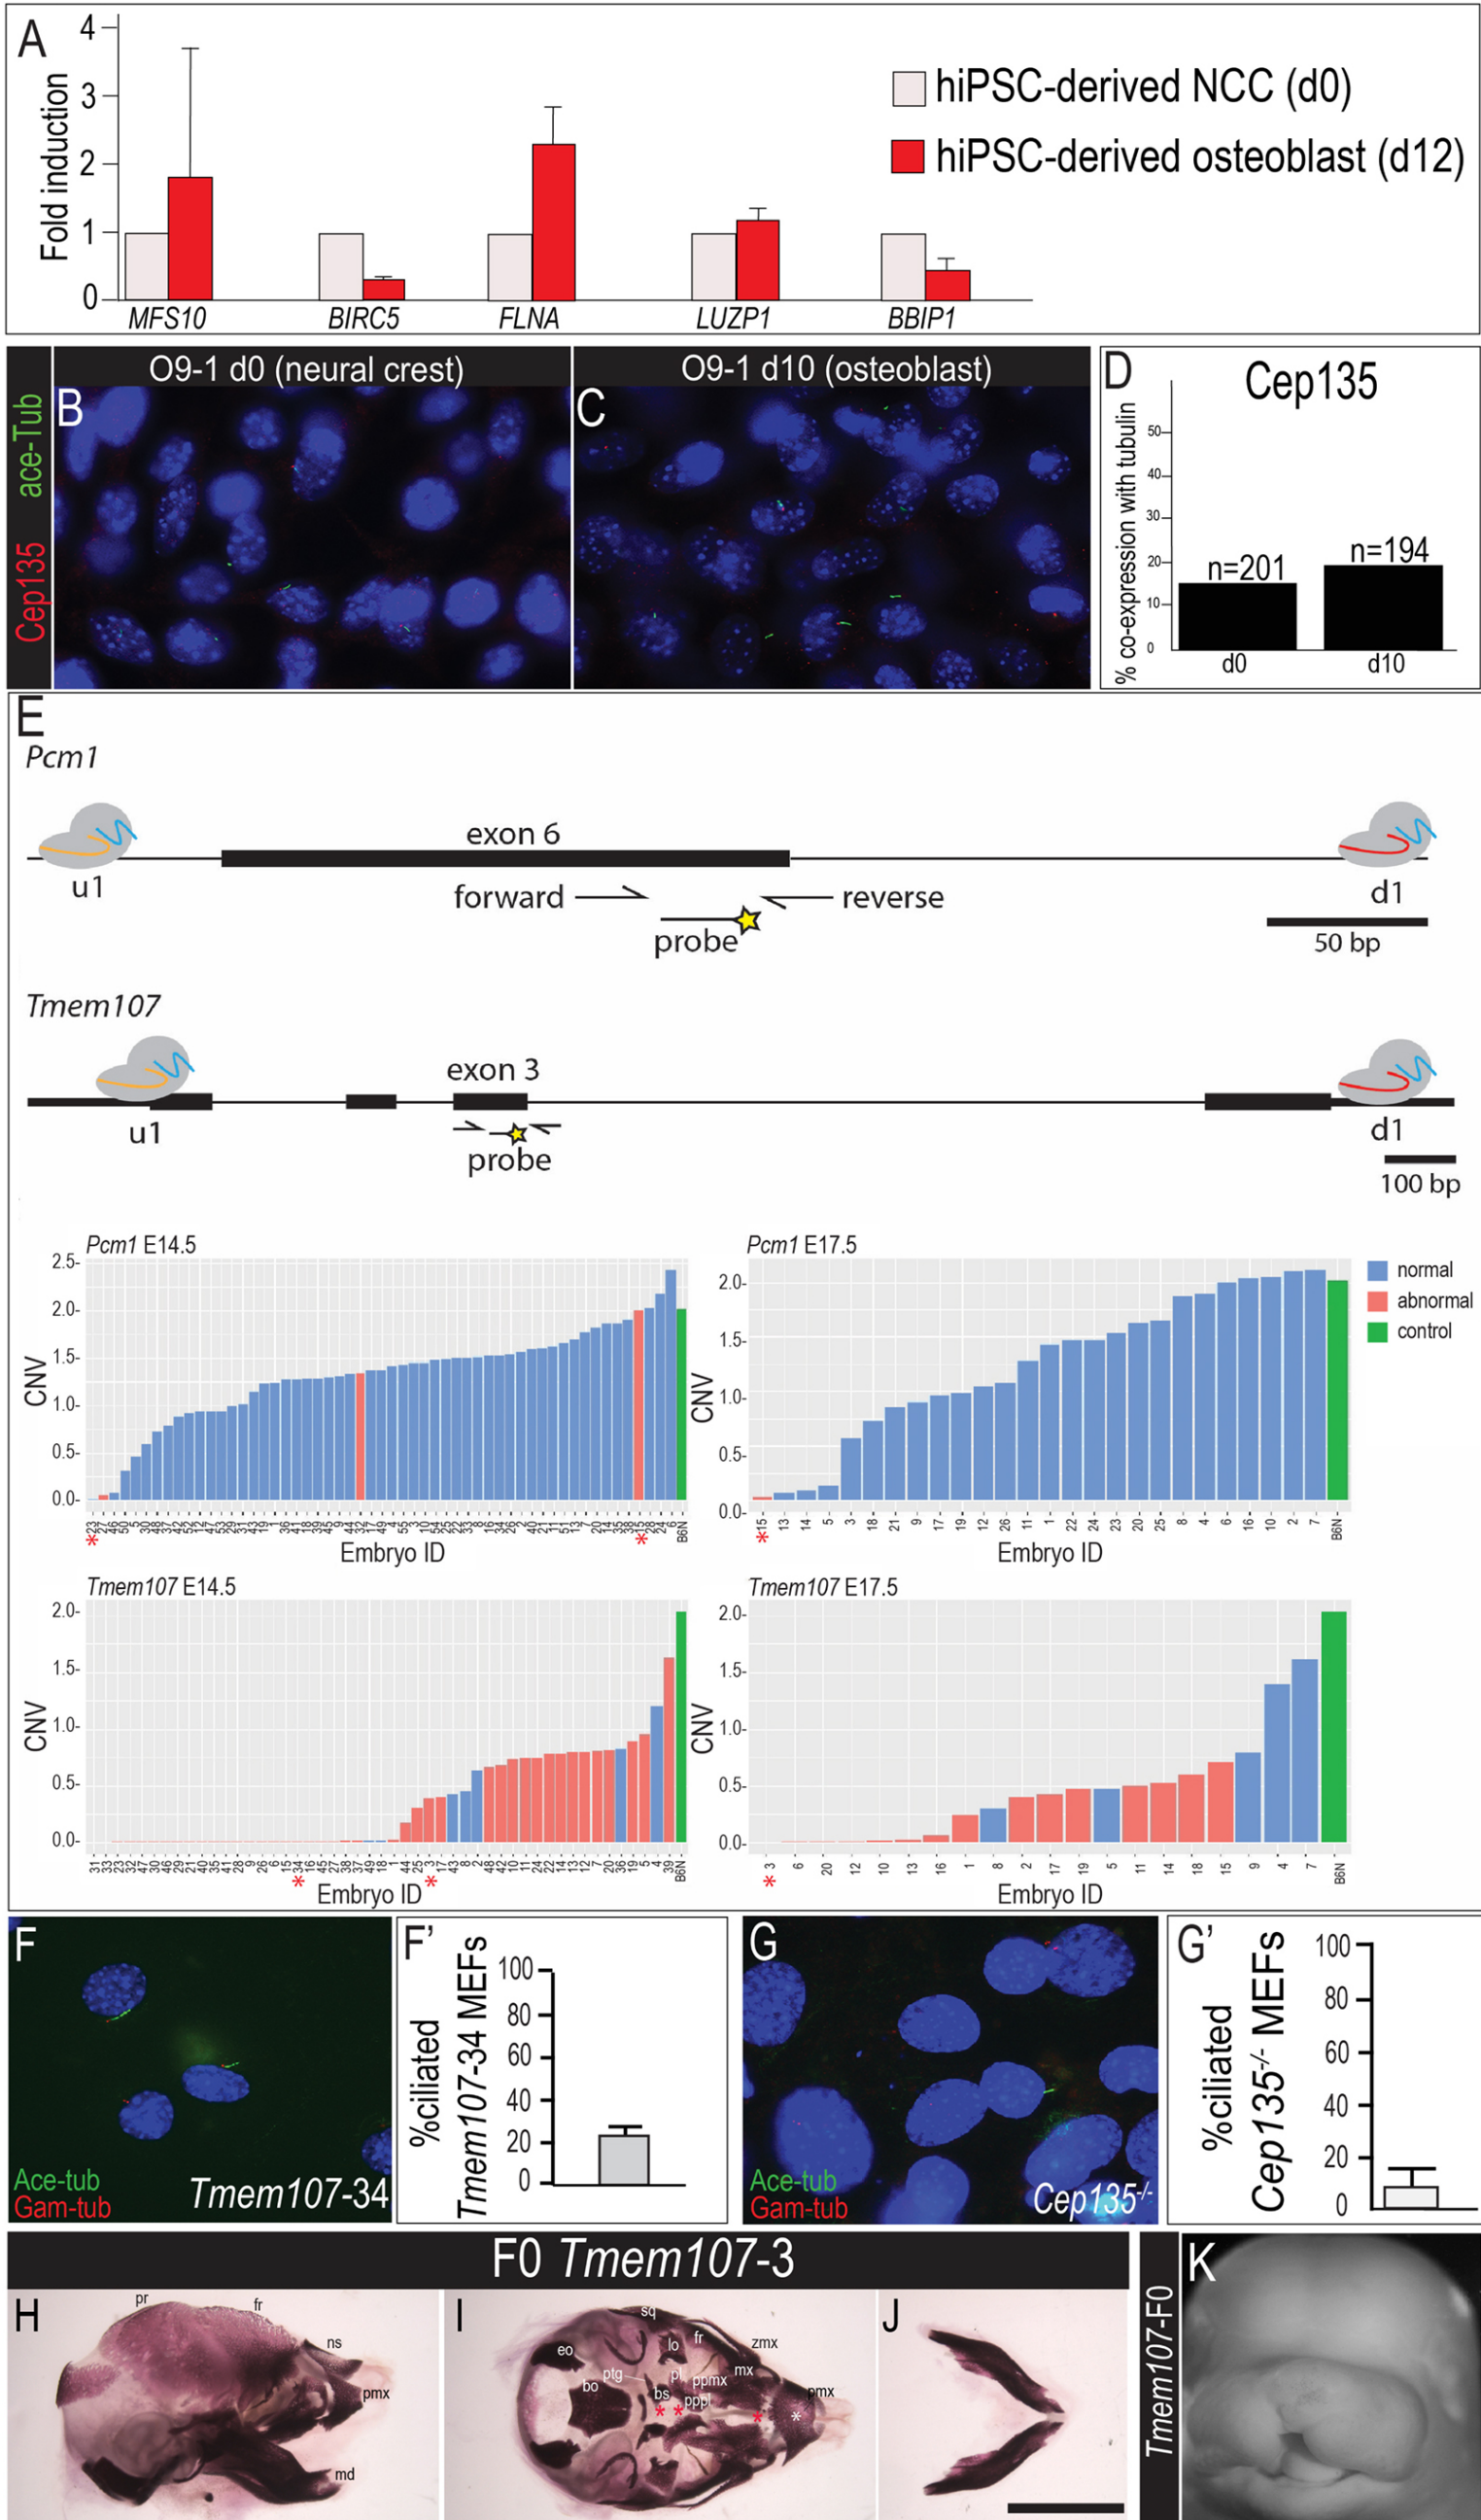

**Fig. S5. Expression and knockout of genes within the osteogenic ciliome.** (A) qPCR for select genes of the osteogenic ciliome during osteoblastic differentiation of hiPSC-derived NCCs (d0) and hiPSC-derived osteoblasts (d12). (B, C) Immunostaining for Cep135 and acetylated-tubulin in 09-1 d0 neural crest and 09-1 d10 osteoblast. (D) Quantification of cells co-expressing of Cep135 and acetylated-tubulin. (E) Schematic diagram of guide design and genotyping assay to determine copy number variation (CNV) using ddPCR for *Pcm1* and *Tmem107* knockout FO embryos. Bar plot shows individual CNV values for FO embryos with phenotype calls based upon gross morphological assessment at time of collection. Red asterisks denote embryos used for MEF analysis. (F) Immunostaining for acetylated-tubulin and gamma-tubulin in MEFs derived from FO *Tmem107-34* embryos. (F') Quantification of percent ciliated cells in MEFs derived from FO *Tmem107-34* embryos. (G) Immunostaining for acetylated-tubulin and gamma-tubulin in MEFs derived from *Cep135-1-* embryos. (G') Quantification of percent ciliated cells in MEFs derived from *Cep135-1-* embryos. (H-J) Lateral, ventral and mandibular views of Alizarin Red stained skulls from FO *Tmem107-3* embryos. Red asterisks indicate hypoplastic bone growth and clefting. White asterisk indicates fusion of premaxilla. (K) Frontal view of a FO *Tmem107* embryo with facial clefting. pr, parietal; ns, nasal; md, mandible; eo, exoccipital; bo, basioccipital; bs, basisphenoid; ptg, pterygoid; pl, palatine; lo, lamina obturans; sq, squamosal; fr, frontal; zmx, zygomatic process of maxilla; mx, maxillary; ppmx, palatal process of maxilla; pppl, palatal process of palatine; pppx, palatal process of premaxilla; pmx, premaxilla.

**Table S1. Characterization of ciliome heterogeneity**[Click here to download Table S1](#)**Table S2. LOEUF decile (%) of DE and non-DE ciliome**

| LOEUF decile (%) | Number of ciliome genes | Number of DE ciliome genes | Number of non-DE ciliome genes | Percentage of DE ciliome genes | Percentage of non-DE ciliome genes | Ratio of Percentages (DE ciliome / non-DE ciliome) |
|------------------|-------------------------|----------------------------|--------------------------------|--------------------------------|------------------------------------|----------------------------------------------------|
| 0                | 137                     | 30                         | 107                            | 11%                            | 16%                                | 0.68                                               |
| 10               | 103                     | 27                         | 76                             | 10%                            | 12%                                | 0.86                                               |
| 20               | 83                      | 24                         | 59                             | 9%                             | 9%                                 | 0.98                                               |
| 30               | 109                     | 31                         | 78                             | 11%                            | 12%                                | 0.96                                               |
| 40               | 134                     | 41                         | 93                             | 15%                            | 14%                                | 1.06                                               |
| 50               | 109                     | 33                         | 76                             | 12%                            | 12%                                | 1.05                                               |
| 60               | 98                      | 34                         | 63                             | 13%                            | 10%                                | 1.30                                               |
| 70               | 76                      | 24                         | 52                             | 9%                             | 8%                                 | 1.11                                               |
| 80               | 58                      | 19                         | 39                             | 7%                             | 6%                                 | 1.17                                               |
| 90               | 22                      | 9                          | 13                             | 3%                             | 2%                                 | 1.67                                               |

**Table S3. Characterization of the non-DE ciliome**[Click here to download Table S3](#)**Table S4. PCR primers**

| Gene           | Forward                      | Reverse                      |
|----------------|------------------------------|------------------------------|
| <i>Gapdh</i>   | 5'-GGGTGTGAACCACGAGAAATA-3'  | 5'-GTCATGAGCCCTCCACAAT-3'    |
| <i>Alp</i>     | 5'-CTCCAAAAGCTCAACACCAATG-3' | 5'-ATTTGTCCATCTCCAGCCG-3'    |
| <i>Ocl</i>     | 5'-CACCTAGCAGACACCATGAG-3'   | 5'-GTTCACTACCTTATTGCCCTCC-3' |
| <i>Runx2</i>   | 5'-GCAATGCCTCCATTCAATCC-3'   | 5'-GGCAATATGTTGTCCTTGGAAC-3' |
| <i>Bbip1</i>   | 5'-CCTTCTGTGGACGTTTGGAGT-3'  | 5'-TGCTGGATGCAGTCTTTTGGC-3'  |
| <i>Tubb2a</i>  | 5'-CACCCCTTCTACAACCAGCA-3'   | 5'-GCTCATCGCTTATCACCTCCC-3'  |
| <i>Luzp1</i>   | 5'-TTCCCCACTCCATGCTCAGG-3'   | 5'-CCAGTCACGATGGGCTGCTA-3'   |
| <i>Flna</i>    | 5'-CCCTTTTCCCCGTACCGTGT-3'   | 5'-CTTTGCCTTTGCCTGCTGCT-3'   |
| <i>Rilpl2</i>  | 5'-AGAGAAGGATGCTGTGGTTG-3'   | 5'-TGGTGATGGTTTTCAGTCTAGG-3' |
| <i>Ccdc88a</i> | 5'-GACTGCCCGTGTGTCAGTCGAT-3' | 5'-TGTTGCTCCCTAGACCTGCT-3'   |
| <i>Cby1</i>    | 5'-GGATGCCTCTCTTTGGCAGC-3'   | 5'-GTTCCCGCTTGACCGATCT-3'    |
| <i>Birc5</i>   | 5'-AAGGAATTGGAAGGCTGGG-3'    | 5'-TTCTTGACAGTGAGGAAGGC-3'   |
| <i>Mfsd10</i>  | 5'-GGGTAGACTGGTTTGCTTCAG-3'  | 5'-CCAGGTAATCAGAGGCAGC-3'    |
| <i>Asap1</i>   | 5'-GAAGCAAATTTACCCAGCCC-3'   | 5'-TGATGTACTCTTACGCACGG-3'   |
| <i>Pcm1</i>    | 5'-AGTGATGTTTCTGCCGTCC-3'    | 5'-CTGAAGTGAGAAGCTGAGACG-3'  |
| <i>Tmem107</i> | 5'-GCTCTTGGCTCATCTGGTG-3'    | 5'-GGTTGCTGCTTTTCGTATTTC-3'  |
| <i>Gsn</i>     | 5'-AGGTCTTTGTCTGGGTTGG-3'    | 5'-TTTGCTGGATCTGTCTCGATG-3'  |
| <i>hBBIP1</i>  | 5' GCCTGAAGACAATCGGAGGG 3'   | 5' CCACAAACAGTGGCCCTTGC 3'   |
| <i>hBIRC5</i>  | 5' CAAGGAGCTGGAAGGCTG 3'     | 5' TTCTTGGCTCTTCTCTGTCC 3'   |
| <i>hLUZP1</i>  | 5' CAGAAGGACCCAAAGTAGCC 3'   | 5' CAGTTGCCTGTAGACACTGAG     |
| <i>hFLNA</i>   | 5' TGTGGCAATCAGAAGGTACG 3'   | 5' ACATTGATCTTAGCCTGCG 3'    |
| <i>hMFS10</i>  | 5' TCTACTTCTCTACCTCTTCTG 3'  | 5' GCATAGGCACCCTGGATG 3'     |
